# Supplementary material
Source: MDPI journal article supplement (https://www.mdpi.com/1099-4300/23/9/1210)

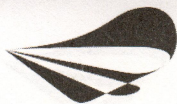**Czas wolny i uczestnictwo w kulturze****42. Do jakich kół zainteresowań na terenie szkoły należysz?**

1. *Tak*
2. *Nie*

|                                                                                       |   |     |
|---------------------------------------------------------------------------------------|---|-----|
| Przedmiotowych kół zainteresowań (np. matematyczne, polonistyczne, historyczne) ..... |   | 234 |
| Szkolnego koła sportowego .....                                                       |   | 235 |
| Sekcji tanecznej .....                                                                |   | 236 |
| Zespołu muzycznego .....                                                              |   | 237 |
| Inne (jakie) .....                                                                    |   | 238 |
| Nigdzie nie należę, gdyż .....                                                        | 1 | 239 |

**43. W jakich zajęciach pozaszkolnych uczestniczysz?**

1. *Tak*
2. *Nie*

|                                                             |  |     |
|-------------------------------------------------------------|--|-----|
| Językowych (np. nauka niemieckiego, angielskiego) .....     |  | 240 |
| Sportowych ( np. zajęcia na basenie, sekcja sportowa) ..... |  | 241 |
| Artystycznych (np. taniec, gra na instrumencie) .....       |  | 242 |
| Hobbystycznych (np. modelarskie) .....                      |  | 243 |
| Inne (jakie?) .....                                         |  | 244 |

**44. Czy – i gdzie – pracujesz społecznie?**

1. *Tak*
2. *Nie*

|                                                                                                   |   |     |
|---------------------------------------------------------------------------------------------------|---|-----|
| W samorządzie szkolnym .....                                                                      |   | 245 |
| W samorządzie klasowym .....                                                                      |   | 246 |
| W organizacji charytatywnej (Wielka Orkiestra Świątecznej Pomocy, pomoc dla zwierząt, itp.) ..... |   | 247 |
| W wolontariacie .....                                                                             |   | 248 |
| Inne (jakie?) .....                                                                               |   | 249 |
| Nigdzie nie działam, gdyż .....                                                                   | 1 | 250 |

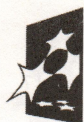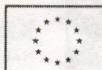

Supplement: s1 [file s1]
