# Supplementary material
Source: MDPI journal article supplement (https://www.mdpi.com/1099-4300/23/9/1210)

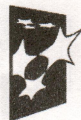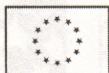

## 27. Jak czujesz się w porównaniu do swoich rówieśników w zakresie:

| Zakresy                                                         | Zawsze<br>czuję się<br>gorzej | Czasem<br>czuję się<br>gorzej | Jestem<br>taki sam | Czasem<br>czuję się<br>lepiej | Zawsze<br>czuję się<br>lepiej |
|-----------------------------------------------------------------|-------------------------------|-------------------------------|--------------------|-------------------------------|-------------------------------|
| A. Odzież i modnych gadżetów                                    | 0                             | 1                             | 2                  | 3                             | 4                             |
| B. Wyglądu (wzrostu, wagi ciała itp.)                           | 0                             | 1                             | 2                  | 3                             | 4                             |
| C. Ocen                                                         | 0                             | 1                             | 2                  | 3                             | 4                             |
| D. Powodzenia u płci przeciwnej                                 | 0                             | 1                             | 2                  | 3                             | 4                             |
| E. Sprawności fizycznej                                         | 0                             | 1                             | 2                  | 3                             | 4                             |
| F. Zdolności, umiejętności                                      | 0                             | 1                             | 2                  | 3                             | 4                             |
| G. Stanu zdrowia (częste choroby)                               | 0                             | 1                             | 2                  | 3                             | 4                             |
| H. Specyficznych trudności (jąkanie, dysleksja, nadpobudliwość) | 0                             | 1                             | 2                  | 3                             | 4                             |
| I. Możliwości finansowych                                       | 0                             | 1                             | 2                  | 3                             | 4                             |
| J. Szans na wyjścia do kina czy na dyskoteki                    | 0                             | 1                             | 2                  | 3                             | 4                             |
| K. Wyznania, religii                                            | 0                             | 1                             | 2                  | 3                             | 4                             |
| L. Narodowości                                                  | 0                             | 1                             | 2                  | 3                             | 4                             |
| M. Możliwości wyjazdów na wakacje za granicę                    | 0                             | 1                             | 2                  | 3                             | 4                             |
| N. Dobrych kosmetyków                                           | 0                             | 1                             | 2                  | 3                             | 4                             |
| O. Miejsca zamieszkania                                         | 0                             | 1                             | 2                  | 3                             | 4                             |
| P. Warunków mieszkaniowych                                      | 0                             | 1                             | 2                  | 3                             | 4                             |
| Q. Sytuacji finansowej rodziny                                  | 0                             | 1                             | 2                  | 3                             | 4                             |
| R. Innej sytuacji w rodzinie                                    | 0                             | 1                             | 2                  | 3                             | 4                             |
| S. Inne ... (nie do wpisania)                                   | 0                             | 1                             | 2                  | 3                             | 4                             |

## Grupy rówieśnicze

## 28. Czy należysz do grupy – paczki kolegów/koleżanek?

1. Tak  
2. Nie

157

## 29. Czy zdarza Ci się odczuwać osamotnienie w grupie koleżeńskie?

1. Tak, bardzo często  
2. Tak, czasami je odczuwam  
3. Tak, ale bardzo rzadko  
4. Nigdy nie odczuwam osamotnienia w relacjach z kolegami

158

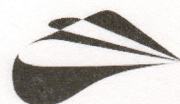

Supplement: s1 [file s1]
