# Supplementary material
Source: MDPI journal article supplement (https://www.mdpi.com/1099-4300/23/9/1210)
Supplement: s1 [file s1]

## Wsparcie

34. Czy jest ktoś (osoba, osoby) do kogo możesz się zawsze zwrócić o pomoc?

197

1. Tak
2. Raczej tak
3. Raczej nie
4. Nie

35. Jeśli podkreśliłeś odpowiedź 1. lub 2., to wymień te osoby. Jeśli podkreśliłeś odpowiedź 3. lub 4. przejdź do pytania 37

1. Tak
2. Nie

*-> powinno być pyt. 36 !*

Kolega/ koleżanka ..... 198

Rodzic ..... 199

Ksiądz ..... 200

Trener ..... 201

Nauczyciel, pedagog szkolny ..... 202

Inne osoby (napisz jakie) ..... 203

36. Czy masz osobę godną zaufania, którą możesz prosić o radę, jeśli masz jakieś problemy?

1. Tak
2. Raczej tak
3. Raczej nie
4. Nie, nie mam takiej osoby

37. Jeśli wybrałeś odpowiedź 1. lub 2. wymień te osoby. Jeśli podkreśliłeś odpowiedź 3. lub 4. przejdź do pytania 38

1. Tak
2. Nie

Kolega/ koleżanka ..... 205

Rodzic ..... 206

Ksiądz ..... 207

Trener ..... 208

Nauczyciel, pedagog szkolny ..... 209

Inne osoby (napisz jakie) ..... 210

38. Czy masz przyjaciela/przyjaciółkę?

1. Tak
2. Nie

211
