# Supplementary material
Source: MDPI journal article supplement (https://www.mdpi.com/1099-4300/23/9/1210)
Supplement: s1 [file s1]

3. **Jeśli masz obawy dotyczące dalszej edukacji to z czym są one związane?** (możesz wybrać więcej niż jedną odpowiedź)

1. *Tak*
2. *Nie*

Nie wiem czy zostanę przyjęty do wybranej szkoły z powodu wyników egzaminu gimnazjalnego

☐ 8

Nie wiem czy rodzice zgodzą się na naukę w wybranej przeze mnie szkole .....

☐ 9

Nie wiem czy moi rodzice będą w stanie finansować dalszą naukę .....

☐ 10

Przypuszczam, że będę musiał/a podjąć pracę, żeby pomóc rodzinie .....

☐ 11

Nie mam żadnych obaw .....

☐ 12

Inne przyczyny .....

☐ 13

4. **Jaki zawód chciałbyś wykonywać w przyszłości .....**

☐ 14

1. .... Chciał(a)bym, aby był to zawód *(tu mają upisać konkretny zawód)*
2. Jeszcze nie zastanawiałem/am się nad tym

☐

### Sytuacja rodziny

5. **Jaka jest obecnie Twoja sytuacja rodzinna?** (Wybierz właściwą odpowiedź)

☐ 15

1. Jestem wychowywany przez oboje rodziców
2. Jestem wychowywany/a tylko przez matkę
3. Jestem wychowywany/a tylko przez ojca
4. Jestem wychowywany przez inne osoby z rodziny
5. Wychowuję się poza rodziną

6. **Jaka jest sytuacja zawodowa Twoich rodziców?**

1. *pracuje w kraju*
2. *pracuje za granicą*
3. *nie pracuje w ogóle*

MATKI .....

☐ 16

OJCA .....

☐ 17

7. **Jak oceniasz sytuację ekonomiczną swojej rodziny** (wybierz jedną odpowiedź)

☐ 18

1. W moim domu jest wszystko; rodzice mogą pozwolić sobie na realizację zachcianek i przyjemności wszystkich członków rodziny; nigdy niczego nie brakuje
2. W moim domu jest wszystko ale żyjemy skromnie, rodzice żyją „z ołówkiem w rękę”, żeby na wszystko starczyło; czasami rodzice dają mi pieniądze na drobne przyjemności
3. W moim domu czasami brakuje pieniędzy na jedzenie, opłaty czy ubrania; jest bardzo skromnie, nie ma pieniędzy na przyjemności, ale jakoś sobie radzimy
