# Supplementary material
Source: MDPI journal article supplement (https://www.mdpi.com/1099-4300/23/9/1210)
Supplement: s1 [file s1]

## Sytuacja osobista

**19. Biorąc pod uwagę Twoje dotychczasowe doświadczenia, możesz powiedzieć o sobie, że masz wpływ na:**

|    | Obszar wpływu                     | Zawsze | Zazwyczaj | Czasami | Rzadko | Prawie wcale | Raczej nie | Zdecydowanie nie |    |
|----|-----------------------------------|--------|-----------|---------|--------|--------------|------------|------------------|----|
| A. | Status materialny                 | 1      | 2         | 3       | 4      | 5            | 6          | 7                | 85 |
| B. | Zdrowie                           | 1      | 2         | 3       | 4      | 5            | 6          | 7                | 86 |
| C. | Oceny                             | 1      | 2         | 3       | 4      | 5            | 6          | 7                | 87 |
| D. | Przyszłe życie zawodowe           | 1      | 2         | 3       | 4      | 5            | 6          | 7                | 88 |
| E. | Stosunki z chłopakiem/ dziewczyną | 1      | 2         | 3       | 4      | 5            | 6          | 7                | 89 |
| F. | Stosunki z innymi ludźmi          | 1      | 2         | 3       | 4      | 5            | 6          | 7                | 90 |
| G. | Wygląd                            | 1      | 2         | 3       | 4      | 5            | 6          | 7                | 91 |
| H. | Stosunki z rodzicami              | 1      | 2         | 3       | 4      | 5            | 6          | 7                | 92 |
| I. | Wolny czas                        | 1      | 2         | 3       | 4      | 5            | 6          | 7                | 93 |

**20. Zastanów się i zaznacz (otocz kółkiem właściwą cyfrę) w jakim stopniu, poniższe cechy Cię określają:**

|    | Cecha            | bardzo wysokim | średnim | małym | wcale |     |
|----|------------------|----------------|---------|-------|-------|-----|
| A. | Atrakcyjność     | 1              | 2       | 3     | 4     | 94  |
| B. | Inteligencja     | 1              | 2       | 3     | 4     | 95  |
| C. | Aktywność        | 1              | 2       | 3     | 4     | 96  |
| D. | Towarzyskość     | 1              | 2       | 3     | 4     | 97  |
| E. | Pracowitość      | 1              | 2       | 3     | 4     | 98  |
| F. | Opiekuńczość     | 1              | 2       | 3     | 4     | 99  |
| G. | Odpowiedzialność | 1              | 2       | 3     | 4     | 100 |
| H. | Samodzielność    | 1              | 2       | 3     | 4     | 101 |
| I. | Wyrozumiałość    | 1              | 2       | 3     | 4     | 102 |
| J. | Gospodarność     | 1              | 2       | 3     | 4     | 103 |
| K. | Zdecydowanie     | 1              | 2       | 3     | 4     | 104 |
| L. | Szczerłość       | 1              | 2       | 3     | 4     | 105 |
| M. | Pewność siebie   | 1              | 2       | 3     | 4     | 106 |
