# Supplementary material
Source: MDPI journal article supplement (https://www.mdpi.com/1099-4300/23/9/1210)
Supplement: s1 [file s1]

**49. Jak często uczestniczysz w różnych formach kultury? (otocz kółkiem właściwą cyfrę)**

| Kategorie   | Przynajmniej raz<br>w tygodniu | Przynajmniej raz<br>w miesiącu | Kilka razy<br>w roku | Rzadziej | Nigdy nie<br>byłem |     |
|-------------|--------------------------------|--------------------------------|----------------------|----------|--------------------|-----|
| Kino        | 1                              | 2                              | 3                    | 4        | 5                  | 269 |
| Teatr       | 1                              | 2                              | 3                    | 4        | 5                  | 270 |
| Filharmonia | 1                              | 2                              | 3                    | 4        | 5                  | 271 |
| Wystawa     | 1                              | 2                              | 3                    | 4        | 5                  | 272 |
| Muzeum      | 1                              | 2                              | 3                    | 4        | 5                  | 273 |

**Uzależnienie**
**50. Czy masz dostęp do (otocz kółkiem właściwą cyfrę)**

| Urządzenia        | Tak – mam<br>własny | Tak – mamy w domu<br>do wspólnego użytku | Nie mam<br>stałego dostępu | Korzystam w<br>domu kolegi |     |
|-------------------|---------------------|------------------------------------------|----------------------------|----------------------------|-----|
| Telefon komórkowy | 1                   | 2                                        | 3                          | 4                          | 274 |
| Komputer          | 1                   | 2                                        | 3                          | 4                          | 275 |
| Internet          | 1                   | 2                                        | 3                          | 4                          | 276 |
| Play station      | 1                   | 2                                        | 3                          | 4                          | 277 |
| Telewizor         | 1                   | 2                                        | 3                          | 4                          | 278 |
