# Supplementary material
Source: MDPI journal article supplement (https://www.mdpi.com/1099-4300/23/9/1210)
Supplement: s1 [file s1]

|                   |  |  |  |  |
|-------------------|--|--|--|--|
| <b>Nr ankiety</b> |  |  |  |  |
|-------------------|--|--|--|--|

1

|             |  |  |
|-------------|--|--|
| Powiat      |  |  |
| Miejscowość |  |  |
| Szkoła      |  |  |
| Klasa       |  |  |

2

3

4

5

### Gimnazjalisto!

Żyjesz w bardzo ciekawych czasach. Świat stwarza Tobie niezliczone możliwości; zdobycze współczesności sprawiają, że masz szansę na własny rozwój, życie pożyteczne i przyjemne. Jednak rzeczywistość to także wiele zagrożeń i trudności. Żyjesz w świecie, w którym tak łatwo się zagubić, być nieszczęśliwym.

Proszę wypełnij kwestionariusz ankiety. Uzyskane wyniki pozwolą na poznanie Ciebie, Twoich obaw i problemów – Twojego miejsca w otaczającej rzeczywistości. Masz szansę wypowiedzieć się i być wysłuchanym – skorzystaj z tego, Może sprawisz, że podjęte zostaną działania, które pozwolą Tobie i Tobie podobnym dobrze poczuć się ze sobą samym, w rodzinie, szkole, wśród rówieśników.

Ankieta jest anonimowa. Proszę bądź szczerzy w swych wypowiedziach.

#### 1. W jakiej szkole planujesz kontynuować naukę po skończeniu gimnazjum?

6

1. *W liceum ogólnokształcącym (keide liceum)*
2. W technikum
3. W zasadniczej szkole zawodowej
4. W ośrodku doskonalenia zawodowego, w którym zdobędę uprawnienia do wykonywania zawodu
5. Nie planuję dalej uczyć się

#### 2. Jak sądzisz, czy uda Ci się zrealizować te plany?

7

1. Tak
2. Raczej tak
3. Raczej nie
4. Nie
