# Supplementary material
Source: MDPI journal article supplement (https://www.mdpi.com/1099-4300/23/9/1210)
Supplement: s1 [file s1]

**39. W jakich sprawach zwracasz się o pomoc do wychowawcy klasy? (Zaznacz właściwe)**

1. Tak
2. Nie

*do jeśli nie rozumie to pkt. 219 - 225*

|                                                                                |     |
|--------------------------------------------------------------------------------|-----|
| Dotyczących problemów w nauce.....                                             | 212 |
| Dotyczących konfliktów z nauczycielem/ nauczycielami.....                      | 213 |
| Dotyczących konfliktów z rówieśnikami.....                                     | 214 |
| Dotyczących agresji i przemocy wobec Ciebie ze strony kolegów/ koleżanek ..... | 215 |
| Dotyczących problemów w rodzinie.....                                          | 216 |
| Inne.....                                                                      | 217 |
| Nie zwracam się do wychowawcy z żadnymi problemami.....                        | 218 |

**40. W jakich sprawach zwracasz się o pomoc do pedagoga szkolnego?**

1. Tak
2. Nie

|                                                                                |     |
|--------------------------------------------------------------------------------|-----|
| Dotyczących problemów w nauce .....                                            | 219 |
| Dotyczących konfliktów z nauczycielem/ nauczycielami.....                      | 220 |
| Dotyczących konfliktów z rówieśnikami.....                                     | 221 |
| Dotyczących agresji i przemocy wobec Ciebie ze strony kolegów/ koleżanek ..... | 222 |
| Dotyczących problemów w rodzinie .....                                         | 223 |
| Inne.....                                                                      | 224 |
| Nie zwracam się do pedagoga z żadnymi problemami .....                         | 225 |

**41. Kto dla Ciebie jest autorytetem? Otocz kółkiem właściwą cyfrę w odpowiedniej kratce**

| Osoba                                   | Zdecydowanie<br>tak | Raczej<br>tak | Raczej<br>nie | Zdecydow<br>anie nie |     |
|-----------------------------------------|---------------------|---------------|---------------|----------------------|-----|
| Nauczyciel                              | 1                   | 2             | 3             | 4                    | 226 |
| Rodzic                                  | 1                   | 2             | 3             | 4                    | 227 |
| Inna osoba z rodziny, kto? .....        | 1                   | 2             | 3             | 4                    | 228 |
| Kolega/koleżanka                        | 1                   | 2             | 3             | 4                    | 229 |
| Idol (np. aktor, sportowiec, piosenkarz | 1                   | 2             | 3             | 4                    | 230 |
| Ksiądz                                  | 1                   | 2             | 3             | 4                    | 231 |
| Trener                                  | 1                   | 2             | 3             | 4                    | 232 |
| Inne osoby, jakie? .....                | 1                   | 2             | 3             | 4                    | 233 |
