# Supplementary material
Source: MDPI journal article supplement (https://www.mdpi.com/1099-4300/23/9/1210)
Supplement: s1 [file s1]

**31. Które z tych zachowań zdarza się Tobie podejmować pod wpływem grupy?**

*→ mogą być napisane  
tępy nagłaśniające*

|          |       |    |     |
|----------|-------|----|-----|
| <i>a</i> | ..... | 1. | 179 |
| <i>b</i> | ..... | 2. | 180 |
| <i>c</i> | ..... | 3. | 181 |

**32. Czy i jak często:**

| Zachowania                                                                                                   | Kilka razy w tygodniu | Kilka razy w semestrze | 1-3 razy w roku szkolnym | Nie zdarzyło mi się |     |
|--------------------------------------------------------------------------------------------------------------|-----------------------|------------------------|--------------------------|---------------------|-----|
| Zostałeś okradziony/a                                                                                        | 1                     | 2                      | 3                        | 4                   | 182 |
| Zostałeś pobity przez kolegów ze szkoły                                                                      | 1                     | 2                      | 3                        | 4                   | 183 |
| Zostałeś pobity przez kolegów spoza szkoły                                                                   | 1                     | 2                      | 3                        | 4                   | 184 |
| Zmuszano Ciebie do przyjęcia narkotyku                                                                       | 1                     | 2                      | 3                        | 4                   | 185 |
| Zmuszano Ciebie do wykonania czynności, których nie chciałeś wykonać                                         | 1                     | 2                      | 3                        | 4                   | 186 |
| Wyzywano, przezywano Ciebie                                                                                  | 1                     | 2                      | 3                        | 4                   | 187 |
| Kaleczono Ciebie                                                                                             | 1                     | 2                      | 3                        | 4                   | 188 |
| Byłeś filmowany telefonem komórkowym i narażony na ośmieszenie (poprzez np. umieszczenie filmu w Internecie) | 1                     | 2                      | 3                        | 4                   | 189 |
| Zmuszano Cię do spożywania alkoholu                                                                          | 1                     | 2                      | 3                        | 4                   | 190 |
| Odurzano Ciebie                                                                                              | 1                     | 2                      | 3                        | 4                   | 191 |
| Wymuszano na Tobie coś (np. pieniędzy, papierosów)                                                           | 1                     | 2                      | 3                        | 4                   | 192 |
| Zniszczono Twoją własność                                                                                    | 1                     | 2                      | 3                        | 4                   | 193 |

**33. Kto jest najbardziej narażony na agresję? Wybierz nie więcej niż trzy odpowiedzi i ponumeruj według ważności (1 – oznacza cechę najważniejszą)**

- 1 Osoby nieśmiałe
- 2 Zaczepiające inne osoby, agresywne
- 3 Osoby, które są gorzej ubrane
- 4 Osoby, które dostają dobre stopnie
- 5 Osoby, które odbiegają wyglądem fizycznym od innych
- 6 Osoby przeszkadzające innym
- 7 Inne – wpisz jakie.....

*ponumeracja*

|   |                                  |
|---|----------------------------------|
| 2 | } trzy pierwsze<br>nagłaśniające |
|   |                                  |
|   |                                  |
| 1 | } inne<br>zabiegające            |
|   |                                  |

194 195  
196

*W ujęciu pny ubrań, odpowiedź uprzedz numer 1-3  
podkreślić odpowiedź*
