# Supplementary material
Source: MDPI journal article supplement (https://www.mdpi.com/1099-4300/23/9/1210)
Supplement: s1 [file s1]

**21. Zaznacz (otocz kółkiem) taką odpowiedź, która opisuje Twoje samopoczucie w ciągu ostatniego tygodnia, łącznie z dniem dzisiejszym. Proszę uwzględnić wszystkie pytania.**

| <b>Myśli i uczucia</b>                                           | <b>Wcale</b> | <b>Rzadko</b> | <b>Czasami</b> | <b>Często</b> | <b>Bardzo często</b> |     |
|------------------------------------------------------------------|--------------|---------------|----------------|---------------|----------------------|-----|
| Odczucie smutku lub przygnębienia                                | 0            | 1             | 2              | 3             | 4                    | 107 |
| Gorszy nastrój                                                   | 0            | 1             | 2              | 3             | 4                    | 108 |
| Napady płaczu lub płaczliwość                                    | 0            | 1             | 2              | 3             | 4                    | 109 |
| Poczucie zniechęcenia                                            | 0            | 1             | 2              | 3             | 4                    | 110 |
| Poczucie beznadziei                                              | 0            | 1             | 2              | 3             | 4                    | 111 |
| Niska samoocena                                                  | 0            | 1             | 2              | 3             | 4                    | 112 |
| Poczucie bezwartościowości i nieadekwatności                     | 0            | 1             | 2              | 3             | 4                    | 113 |
| Poczucie winy lub wstydu                                         | 0            | 1             | 2              | 3             | 4                    | 114 |
| Krytykowanie i obwinianie siebie                                 | 0            | 1             | 2              | 3             | 4                    | 115 |
| Problemy z podejmowaniem decyzji                                 | 0            | 1             | 2              | 3             | 4                    | 116 |
| <b>Związki z ludźmi i działanie</b>                              |              |               |                |               |                      |     |
| Utrata zainteresowania życiem rodzinnym, przyjaciółmi, znajomymi | 0            | 1             | 2              | 3             | 4                    | 117 |
| Samotność                                                        | 0            | 1             | 2              | 3             | 4                    | 118 |
| Spędzanie mniej czasu z rodziną lub przyjaciółmi                 | 0            | 1             | 2              | 3             | 4                    | 119 |
| Utrata motywacji                                                 | 0            | 1             | 2              | 3             | 4                    | 120 |
| Utrata zainteresowania szkołą (pracą) lub innymi działaniami     | 0            | 1             | 2              | 3             | 4                    | 121 |
| Unikanie szkoły (pracy) i innych działań                         | 0            | 1             | 2              | 3             | 4                    | 122 |
| Utrata przyjemności i zadowolenia z życia                        | 0            | 1             | 2              | 3             | 4                    | 123 |
| <b>Objawy fizyczne</b>                                           |              |               |                |               |                      |     |
| Poczucie przemęczenia                                            | 0            | 1             | 2              | 3             | 4                    | 124 |
| Problemy z zasypianiem lub spanie za długo                       | 0            | 1             | 2              | 3             | 4                    | 125 |
| Zmniejszone lub zwiększone łaknienie                             | 0            | 1             | 2              | 3             | 4                    | 126 |
| Zamartwianie się o swoje zdrowie                                 | 0            | 1             | 2              | 3             | 4                    | 127 |
| <b>Impulsy samobójcze</b>                                        |              |               |                |               |                      |     |
| Czy dręczą cię myśli samobójcze                                  | 0            | 1             | 2              | 3             | 4                    | 128 |
| Czy chciałbyś zakończyć życie?                                   | 0            | 1             | 2              | 3             | 4                    | 129 |
| Czy masz plan, jak zrobić sobie krzywdę                          | 0            | 1             | 2              | 3             | 4                    | 130 |
