# Supplementary material
Source: MDPI journal article supplement (https://www.mdpi.com/1099-4300/23/9/1210)
Supplement: s1 [file s1]

Now

### 18. Czy w ciągu ostatniego miesiąca:

|    | Zachowania                                                                                      | Nie, nigdy | Tak, jeden raz | Tak, więcej niż raz |    |
|----|-------------------------------------------------------------------------------------------------|------------|----------------|---------------------|----|
| A. | Twoi rodzice krzyczeli na Ciebie                                                                | 1          | 2              | 3                   | 73 |
| B. | Usłyszałeś/aś od rodziców obraźliwe słowa?                                                      | 1          | 2              | 3                   | 74 |
| C. | Zostałeś/aś spoliczkowany/a przez rodziców?                                                     | 1          | 2              | 3                   | 75 |
| D. | Zostałeś/aś zbity/a przez rodziców?                                                             | 1          | 2              | 3                   | 76 |
| E. | W Twoim domu dochodziło do awantur, w których rodzice krzyczeli i wyzywali się nawzajem?        | 1          | 2              | 3                   | 77 |
| F. | Rodzice mówili, że jesteś nic nie wart/warta i nic z Ciebie nie będzie?                         | 1          | 2              | 3                   | 78 |
| G. | Było Ci bardzo źle w Twoim domu?                                                                | 1          | 2              | 3                   | 79 |
| H. | Uciekałeś/aś ze swojego domu z lęku przed pobiciem?                                             | 1          | 2              | 3                   | 80 |
| I. | Bateś/aś się swoich rodziców?                                                                   | 1          | 2              | 3                   | 81 |
| J. | Rodzice zabraniali Ci za karę jedzenia lub spania?                                              | 1          | 2              | 3                   | 82 |
| K. | Zdarzyło się, że ktoś z rodziny stosował wobec Ciebie tzw. zły dotyk (dotykał części intymnych) | 1          | 2              | 3                   | 83 |
| L. | Zdarzyła się interwencja Policji z powodu kłótni czy awantur?                                   | 1          | 2              | 3                   | 84 |
