# Supplementary material
Source: MDPI journal article supplement (https://www.mdpi.com/1099-4300/23/9/1210)
Supplement: s1 [file s1]

*kon*

**14. Młodzi ludzie czasem odczuwają osamotnienie w rodzinie. Co najczęściej robisz, gdy zdarza Ci się poczuć samotnym w domu? Możesz dokonać wyboru trzech odpowiedzi.**

1. Słucham muzyki
2. Oglądam telewizję
3. Gram w gry komputerowe
4. Surfuje po Internecie
5. Rozmawiam ze znajomymi na GG, czacie
6. Piszę co myślę na własnym blogu
7. Wychodzę z domu i spaceruję
8. Wychodzę z domu i spotykam się z kolegami/koleżankami
9. Sięgam po alkohol
10. Sięgam po narkotyki
11. Sięgam po papierosy
12. Inne, jakie .....
13. Nic nie robię
14. Nigdy nie odczułem osamotnienia w rodzinie

|  |    |
|--|----|
|  | 59 |
|  | 60 |
|  | 61 |

*kon* **15. Czy jest coś co chciałbyś zmienić w swojej rodzinie? Wpisz krótką wypowiedź.**

.....

.....

.....

*1. Nic*  
*2. Więcej czasu z wujem*

|  |    |
|--|----|
|  | 62 |
|  | 63 |
|  | 64 |

*kon* **16. Kiedy czujemy się samotni często towarzyszą temu inne stany, emocje i myśli. Oceń jak bardzo Ty ich doświadczasz**

|                        | Prawie<br>nie czuję |   |   |   |   |   | Odczuwam<br>bardzo<br>silnie |    |
|------------------------|---------------------|---|---|---|---|---|------------------------------|----|
|                        | 1                   | 2 | 3 | 4 | 5 | 6 | 7                            |    |
| a) Czuję się bezradny  | 1                   | 2 | 3 | 4 | 5 | 6 | 7                            | 65 |
| b) Odczuwam żal        | 1                   | 2 | 3 | 4 | 5 | 6 | 7                            | 66 |
| c) Czuję obojętność    | 1                   | 2 | 3 | 4 | 5 | 6 | 7                            | 67 |
| d) Jestem przygnębiony | 1                   | 2 | 3 | 4 | 5 | 6 | 7                            | 68 |
| e) Mam złe myśli       | 1                   | 2 | 3 | 4 | 5 | 6 | 7                            | 69 |
| f) Inne, jakie         | 1                   | 2 | 3 | 4 | 5 | 6 | 7                            | 70 |
| g) Nigdy nie odczułem  | 1                   | 2 | 3 | 4 | 5 | 6 | 7                            | 71 |

*Jeśli nie ma tych wymienionych stanów to oznacza się 1*  
**17. Czy rozmawiałeś z kimś o swoim poczuciu osamotnienia?**

1. Nie, choć to czasem przeżywam, z nikim o tym nie rozmawiam
2. Tak, z kim? .... mają wymienić

|  |    |
|--|----|
|  | 72 |
|  |    |
|  |    |
