# Supplementary material
Source: MDPI journal article supplement (https://www.mdpi.com/1099-4300/23/9/1210)
Supplement: s1 [file s1]

**53. Czy zdarza się, że odkładasz na później naukę czy obowiązki domowe, by mieć więcej czasu na (otocz kółkiem właściwą cyfrę):**

| Czynność                        | Nigdy | Kilka razy w miesiącu | Kilka razy w tygodniu | Codziennie |     |
|---------------------------------|-------|-----------------------|-----------------------|------------|-----|
| Rozmowy przez telefon komórkowy | 1     | 2                     | 3                     | 4          | 295 |
| Pisanie i wysyłanie sms-ów      | 1     | 2                     | 3                     | 4          | 296 |
| Siedzenie przed komputerem      | 1     | 2                     | 3                     | 4          | 297 |
| Korzystanie z Internetu         | 1     | 2                     | 3                     | 4          | 298 |
| Gry playstation                 | 1     | 2                     | 3                     | 4          | 299 |
| Oglądanie telewizji             | 1     | 2                     | 3                     | 4          | 300 |

### Metryczka

**54. Czy jesteś? .....**  301

1. *Chłopcem*
2. *Dziewczyną*

**55. Jakie wykształcenie mają Twoi rodzice?**

1. *Podstawowe*
2. *Zawodowe*
3. *Średnie*
4. *Wyższe*

*5. Nie wiem*

A) Ojciec .....  302

B) Matka .....  303

**56. Ile dzieci, łącznie z Tobą, jest w Twojej rodzinie? .....**  304

1. *Jedno (jesteś jedynakiem/jedynaczką)*
2. *Dwoje*
3. *Troje i więcej*

**Dziękujemy za wypełnienie ankiety**
