# Supplementary material
Source: MDPI journal article supplement (https://www.mdpi.com/1099-4300/23/9/1210)
Supplement: s1 [file s1]

**45. Jak spędzacie w grupie swój wolny czas? Możesz wybrać więcej niż jedną odpowiedź**

1. *Tak*
2. *Nie*

|                                                 |  |     |
|-------------------------------------------------|--|-----|
| Spotykamy się u kogoś z naszych w domu .....    |  | 251 |
| Gramy na komputerze .....                       |  | 252 |
| Idziemy do galerii lub centrum handlowego ..... |  | 253 |
| Siedzimy na klatce schodowej .....              |  | 254 |
| Chodzimy po mieście .....                       |  | 255 |
| Gramy na boisku w piłkę .....                   |  | 256 |

**46. Jakie wartości mają w Waszej grupie największe znaczenie? Możesz wybrać więcej niż jedną odpowiedź**

1. *Tak*
2. *Nie*

|                           |  |     |
|---------------------------|--|-----|
| Wykształcenie .....       |  | 257 |
| Praca .....               |  | 258 |
| Zdrowie .....             |  | 259 |
| Pieniądze .....           |  | 260 |
| Religia .....             |  | 261 |
| Zabawa .....              |  | 262 |
| Aktywność społeczna ..... |  | 263 |
| Inne, jakie? .....        |  | 264 |

**47. Czy masz hobby? .....**

1. *Nie*
2. *Tak, jakie? .....*

*3. kółko*

|  |     |
|--|-----|
|  | 265 |
|  |     |
|  |     |
|  |     |

**48. Zdarza się czasem, że nie korzystasz z żadnych ofert spędzania czasu wolnego i nudzisz się. Bywa, że nuda jest trudna do zniesienia. Jak sobie z nią radzisz?**

|       |  |     |
|-------|--|-----|
| ..... |  | 266 |
| ..... |  | 267 |
| ..... |  | 268 |

*3. uzależnienie i pić kupa !*
