# Supplementary material
Source: MDPI journal article supplement (https://www.mdpi.com/1099-4300/23/9/1210)

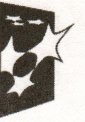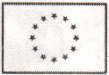

## Sytuacja szkolna

### 22. Jakim jesteś uczniem?

1. Bardzo dobrym i celującym (średnia ocen powyżej 5,0)
2. Dobrym i bardzo dobrym (średnia ocen: 4,0 do 4,9)
3. Dobrym i dostatecznym (średnia ocen: 3,0 do 3,9)
4. Dostatecznym i miernym (średnia ocen poniżej 3,0)

### 23. Czy zdarzyło się, że powtarzałeś klasę/klasę?

1. Tak
2. Nie

Jeśli tak, to którą/ które? .....

### 24. Co sprawia Ci w szkole największą trudność (zaznacz nie więcej niż trzy odpowiedzi)

1. Zdobyć pozytywną ocenę z większości przedmiotów
2. Zdobyć pozytywną ocenę z niektórych przedmiotów
3. Stworzenie dobrych relacji z kolegami/koleżankami
4. Stworzenie dobrych relacji z nauczycielami
5. Zachowanie dyscypliny na lekcjach
6. Poprawne zachowanie podczas przerw i w czasie pozalekcyjnym
7. Nic mi nie sprawia trudności
8. Inne .....

### 25. Czy czujesz się w swojej szkole bezpieczny?

1. zdecydowanie tak
2. raczej tak
3. raczej nie
4. zdecydowanie nie

### 26. Jak oceniasz swoje relacje z rówieśnikami z klasy?

1. jako bardzo dobre
2. jako raczej dobre
3. jako raczej złe
4. jako zdecydowanie złe

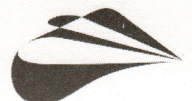

Supplement: s1 [file s1]
