# Supplementary material
Source: MDPI journal article supplement (https://www.mdpi.com/1099-4300/23/9/1210)
Supplement: s1 [file s1]

*Kan.*

**13.**

**Proszę, odnieś każde twierdzenie do siebie i swoich relacji z rodzicami, a następnie dokonaj oceny jego prawdziwości (poprzez otoczenie kółkiem cyfry w odpowiedniej kratce)**

*książka w  
korycie odpow.*

| Oceniane kategorie                                           | Całkowicie prawdziwe | Raczej prawdziwe | Trudno powiedzieć | Raczej nieprawd. | Całkowicie nieprawd. |    |
|--------------------------------------------------------------|----------------------|------------------|-------------------|------------------|----------------------|----|
| A. Odczuwam, że rodzice są ze mnie zadowoleni                | 1                    | 2                | 3                 | 4                | 5                    | 49 |
| B. Czasem mam wrażenie, że rodzice mnie nie zauważają        | 1                    | 2                | 3                 | 4                | 5                    | 50 |
| C. Czuję, że rodzice w małym stopniu interesują się mną      | 1                    | 2                | 3                 | 4                | 5                    | 51 |
| D. W kłopotach mogę liczyć na radę i pomoc rodziców          | 1                    | 2                | 3                 | 4                | 5                    | 52 |
| E. Czasem zastanawiam się, czy rodzice naprawdę mnie kochają | 1                    | 2                | 3                 | 4                | 5                    | 53 |
| F. Rodzice poświęcają mi mało czasu                          | 1                    | 2                | 3                 | 4                | 5                    | 54 |
| G. Odczuwam, że jestem bliski swoim rodzicom                 | 1                    | 2                | 3                 | 4                | 5                    | 55 |
| H. Trudno mi rozmawiać z rodzicami                           | 1                    | 2                | 3                 | 4                | 5                    | 56 |
| I. Odczuwam, że jestem dla rodziców ważną osobą              | 1                    | 2                | 3                 | 4                | 5                    | 57 |
| J. Mam wrażenie, że rodzice mnie nie rozumieją               | 1                    | 2                | 3                 | 4                | 5                    | 58 |
