# Supplementary material
Source: MDPI journal article supplement (https://www.mdpi.com/1099-4300/23/9/1210)
Supplement: s1 [file s1]

4. W moim domu często brakuje pieniędzy na jedzenie, opłaty czy ubranie; często zapożyczamy się, ale wszystkie długi oddajemy
5. W moim domu bardzo często brakuje pieniędzy na jedzenie, opłaty czy ubranie; ale pomagają nam pomoc społeczna a także inni życzliwi ludzie

**8. Jakie są główne troski Twojej rodziny w ostatnim czasie? (możesz dokonać wyboru kilku odpowiedzi)**

1. *Tak*  
2. *Nie*

- |                                                                                                     |                      |    |
|-----------------------------------------------------------------------------------------------------|----------------------|----|
| ✓ A. Brak pracy dla obojga rodziców                                                                 |                      | 19 |
| ✓ B. Brak pracy dla jednego z rodziców                                                              |                      | 20 |
| ✓ C. Niskie zarobki rodziców/rodzica                                                                |                      | 21 |
| D. Konflikty w rodzinie                                                                             |                      | 22 |
| E. Problem z częstym spożywaniem alkoholu przez (wpisz kogo?)                                       | <i>głównie matkę</i> | 23 |
| ✓ F. Zadłużenie, konieczność spłaty kredytów                                                        |                      | 24 |
| ✓ G. Zła sytuacja mieszkaniowa                                                                      |                      | 25 |
| ✓ H. Brak pieniędzy na podstawowe potrzeby rodziny (jedzenie, odzież, podręczniki i pomoce szkolne) |                      | 26 |
| I. Rodzice (lub jedno z nich) bardzo dużo pracuje                                                   |                      | 27 |
| J. Prawie nigdy nie spędzamy czasu wolnego                                                          |                      | 28 |
| K. Opieka na osobą chorą albo niepełnosprawną                                                       |                      | 29 |
| L. W ostatnim czasie nie ma w mojej rodzinie żadnych trosk                                          |                      | 30 |

**9. Czy pomagasz rodzinie w rozwiązywaniu Jej trosk i problemów? Jeśli tak, to w jaki sposób?**

Możesz dokonać wyboru kilku odpowiedzi.

1. *Tak*  
2. *Nie*

- |                                                                                                                 |  |    |
|-----------------------------------------------------------------------------------------------------------------|--|----|
| A. Staram się oszczędzać, rezygnuję z własnych przyjemności, żeby rodzice nie musieli wydawać na mnie pieniędzy |  | 31 |
| B. Pomagam w domu, żeby rodzice mogli więcej pracować poza domem                                                |  | 32 |
| C. Pomagam rodzicom w pracy zawodowej (np. w prowadzeniu gospodarstwa rolnego, w warsztacie, sklepie i in.)     |  | 33 |
|                                                                                                                 |  | 34 |
