# Supplementary material
Source: MDPI journal article supplement (https://www.mdpi.com/1099-4300/23/9/1210)
Supplement: s1 [file s1]

- D. Podejmuję pracę
- E. Nie muszę pomagać, bo nie ma większych trosk
- F. Inne

|  |    |
|--|----|
|  | 35 |
|  | 36 |
|  | 37 |

**10. Jeśli pokreśliłeś odpowiedź D w pytaniu 9 wpisz jakie prace wykonujesz?**

Jeśli dokonałeś/aś innego wyboru przejdź do pytania 13

1. *Tak*
2. *Nie*

- A. Pracuję na godziny (np. pomoc w sprzątaniu, pilnowanie dzieci innych osób, przenoszeniu towaru i in.)
- B. roznoszę ulotki
- C. pracuję w promocji (np. reklamujesz towary w sklepie)
- D. proszę innych o pieniądze na podręczniki czy jedzenie
- E. Zbieram płody leśne (jagody, grzyby, jeżyny, drzewo)
- F. Sprzedaję (płody leśne, kwiaty, owoce)
- G. Biorę udział w pracach sezonowych (żniwa, sianokosy, wykopki i in.)
- H. Myję szyby w samochodach, pracuję na parkingu
- I. Inne

|  |    |
|--|----|
|  | 38 |
|  | 39 |
|  | 40 |
|  | 41 |
|  | 42 |
|  | 43 |
|  | 44 |
|  | 45 |
|  | 46 |
|  | 47 |

**11. Z czyjej inicjatywy podejmujesz wyżej wymienioną pracę? .....**

1. wymagają tego ode mnie rodzice
2. czuję się w obowiązku wspomóc finansowo rodzinę
3. z własnej inicjatywy w celu zwiększenia swojego kieszonkowego
4. z inicjatywy kolegów i koleżanek
5. inne (jakie).....

**12. Jeśli podkreśliłeś odpowiedź D) w pytaniu 9, określ na co przeznaczasz zarobione pieniądze?**

1. w całości oddaję rodzicom
2. część oddaję rodzicom, część pozostawiam na swoje potrzeby
3. w całości na swoje utrzymanie np. odzież, bilety, jedzenie
4. w całości na swoje przyjemności np. używki, zabawa, kino
5. na swoje utrzymanie i swoje przyjemności

|  |    |
|--|----|
|  | 48 |
|--|----|
