# Supplementary material
Source: MDPI journal article supplement (https://www.mdpi.com/1099-4300/23/9/1210)
Supplement: s1 [file s1]

### 30. Jak często zdarza Ci się:

| Zachowania                                                                                                  | Kilka razy<br>w<br>tygodniu | Kilka razy<br>w<br>semestrze | 2-3 razy w<br>roku<br>szkolnym | Nie<br>zdarzyło<br>mi się |     |
|-------------------------------------------------------------------------------------------------------------|-----------------------------|------------------------------|--------------------------------|---------------------------|-----|
| A. Chodzić na wagary                                                                                        | 1                           | 2                            | 3                              | 4                         | 159 |
| B. Uciekać z domu                                                                                           | 1                           | 2                            | 3                              | 4                         | 160 |
| C. Palić papierosy                                                                                          | 1                           | 2                            | 3                              | 4                         | 161 |
| D. Dokonywać drobnych kradzieży                                                                             | 1                           | 2                            | 3                              | 4                         | 162 |
| E. Dokonywać poważnych kradzieży (zgłoszona na Policję)                                                     | 1                           | 2                            | 3                              | 4                         | 163 |
| F. Pobić kolegę/koleżankę ze szkoły                                                                         | 1                           | 2                            | 3                              | 4                         | 164 |
| G. Pobić osobę spoza szkoły                                                                                 | 1                           | 2                            | 3                              | 4                         | 165 |
| H. Przyjmować narkotyki                                                                                     | 1                           | 2                            | 3                              | 4                         | 166 |
| I. Dokonywać samookaleczenia                                                                                | 1                           | 2                            | 3                              | 4                         | 167 |
| J. Spożywać alkohol                                                                                         | 1                           | 2                            | 3                              | 4                         | 168 |
| K. Przyjmować środki odurzające                                                                             | 1                           | 2                            | 3                              | 4                         | 169 |
| L. Przyjmować dopalacze                                                                                     | 1                           | 2                            | 3                              | 4                         | 170 |
| M. Wyzywać, przezywać kolegów/koleżanki                                                                     | 1                           | 2                            | 3                              | 4                         | 171 |
| N. Wymuszać na kimś coś (np. pieniądze, papierosy)                                                          | 1                           | 2                            | 3                              | 4                         | 172 |
| O. Zniszczyć rzecz należącą do kolegi / koleżanki                                                           | 1                           | 2                            | 3                              | 4                         | 173 |
| P. Niszczyć mienie szkoły (np. ciąć ławkę, wyrywać klamkę)                                                  | 1                           | 2                            | 3                              | 4                         | 174 |
| Q. Dewastować mienie społeczne (autobusy, przystanki)                                                       | 1                           | 2                            | 3                              | 4                         | 175 |
| R. Malować graffiti                                                                                         | 1                           | 2                            | 3                              | 4                         | 176 |
| S. Filmować kogoś telefonem komórkowym z zamiarem ośmieszenia (poprzez np. umieszczenie filmu w Internecie) | 1                           | 2                            | 3                              | 4                         | 177 |
| T. Znęcać psychicznie nad kimś                                                                              | 1                           | 2                            | 3                              | 4                         | 178 |
