# Supplementary material
Source: MDPI journal article supplement (https://www.mdpi.com/1099-4300/23/9/1210)
Supplement: s1 [file s1]

**51. Zastanów się i zaznacz ile czasu dziennie poświęcasz na (otocz kółkiem właściwą cyfrę)**

| Czynność                                          | W dni powszednie      |                  |                |                 | W dni wolne od nauki |                |                 |                 |     |
|---------------------------------------------------|-----------------------|------------------|----------------|-----------------|----------------------|----------------|-----------------|-----------------|-----|
|                                                   | W ogóle nie korzystam | Poniżej 2 godzin | Od 2 do 4 godz | Powyżej 4 godz. | Poniżej 2 godz.      | Od 2 do 4 godz | Od 4 do 6 godz. | Powyżej 6 godz. |     |
| Rozmowy telefoniczne                              | 1                     | 2                | 3              | 4               | 1                    | 2              | 3               | 4               | 279 |
| Sms-y (wysyłanie i czytanie)                      | 1                     | 2                | 3              | 4               | 1                    | 2              | 3               | 4               | 280 |
| Gry komputerowe                                   | 1                     | 2                | 3              | 4               | 1                    | 2              | 3               | 4               | 281 |
| Korzystanie z komunikatorów w Internecie (np. GG) | 1                     | 2                | 3              | 4               | 1                    | 2              | 3               | 4               | 282 |
| Prowadzenie własnego bloga                        | 1                     | 2                | 3              | 4               | 1                    | 2              | 3               | 4               | 283 |
| Poszukiwanie nowych znajomości                    | 1                     | 2                | 3              | 4               | 1                    | 2              | 3               | 4               | 284 |
| Oglądanie filmów z internetu                      | 1                     | 2                | 3              | 4               | 1                    | 2              | 3               | 4               | 285 |
| Czytanie wiadomości politycznych i społecznych    | 1                     | 2                | 3              | 4               | 1                    | 2              | 3               | 4               | 286 |
| Oglądanie telewizji                               | 1                     | 2                | 3              | 4               | 1                    | 2              | 3               | 4               | 287 |
| Gry playstation                                   | 1                     | 2                | 3              | 4               | 1                    | 2              | 3               | 4               | 288 |

(na internet)

**52. Jak często Twój rodzic narzeka na to, że zbyt dużo czasu przeznaczasz na (otocz kółkiem właściwą cyfrę):**

| Czynność                        | Nigdy | Kilka razy w miesiącu | Kilka razy w tygodniu | Codziennie |     |
|---------------------------------|-------|-----------------------|-----------------------|------------|-----|
| Rozmowy przez telefon komórkowy | 1     | 2                     | 3                     | 4          | 289 |
| Pisanie i wysyłanie sms-ów      | 1     | 2                     | 3                     | 4          | 290 |
| Siedzenie przed komputerem      | 1     | 2                     | 3                     | 4          | 291 |
| Korzystanie z Internetu         | 1     | 2                     | 3                     | 4          | 292 |
| Gry playstation                 | 1     | 2                     | 3                     | 4          | 293 |
| Oglądanie telewizji             | 1     | 2                     | 3                     | 4          | 294 |
